# Supplementary material
Source: PubMed Central journal article supplement (PMC9126110)
Supplement: AJA-30-800-s001.pdf [file AJA-30-800-s001.pdf]

**Supplemental Material S1.** Selected publications of CF-specific evidence-based outcomes for ototoxicity.

| Publication information                                                                                                                                                                                                                 | Who did the study target?                        | What was being assessed?                                               | Result                                                                                                                                                                                                                               | Recommendation                                                                                                                                                                                                                      |
|-----------------------------------------------------------------------------------------------------------------------------------------------------------------------------------------------------------------------------------------|--------------------------------------------------|------------------------------------------------------------------------|--------------------------------------------------------------------------------------------------------------------------------------------------------------------------------------------------------------------------------------|-------------------------------------------------------------------------------------------------------------------------------------------------------------------------------------------------------------------------------------|
| <b>Maru et al. 2018</b><br>"Current practice of ototoxicity management across the United Kingdom (UK)" <i>International Journal of Audiology</i>                                                                                        | Medical care team members (audiology, ENT, etc.) | Current methods of ototoxic management                                 | Inconsistency and variation were noted in ototoxicity management protocols, with 72% reporting an absence of monitoring protocols.                                                                                                   | Develop national guidelines to provide guidance for minimum standards of care.                                                                                                                                                      |
| <b>Konrad-Martin et al. 2018</b> "Applying U.S. national guidelines for ototoxicity monitoring in adult patients: perspectives on patient populations, service gaps, barriers and solutions." <i>International Journal of Audiology</i> | Review of US national audiology guidelines       | Guidelines in relation to "real world" application                     | Perceived barriers were related to accessing and testing patients. Use of abbreviated screening methods facilitated monitoring.                                                                                                      | The most effective programs integrated audiological management into care pathways of other clinical specialties.                                                                                                                    |
| <b>Blankenship et al. 2020</b> "Functional Impacts of Aminoglycoside treatment on Speech Perception and Extended High Frequency Hearing Loss in a Pediatric Cystic Fibrosis Cohort." <i>Journal of the</i>                              | Children with CF                                 | Effects of aminoglycosides on hearing and speech-in-noise capabilities | Children with CF have a higher prevalence hearing loss; poorer speech-in-noise performance; and higher rates of multiple symptoms associated with otologic disorders (tinnitus, hearing difficulty, dizziness, imbalance, and otitis | Persons with CF should be asked about otologic symptoms and receive baseline hearing assessment(s) prior to treatment with potentially ototoxic medications to promote early intervention for audiological rehabilitation services. |

|                                                                                                                                                                                                |                                           |                                                                       |                                                                                                                                                                                                           |                                                                                                                                              |
|------------------------------------------------------------------------------------------------------------------------------------------------------------------------------------------------|-------------------------------------------|-----------------------------------------------------------------------|-----------------------------------------------------------------------------------------------------------------------------------------------------------------------------------------------------------|----------------------------------------------------------------------------------------------------------------------------------------------|
| <i>American Academy of Audiology</i>                                                                                                                                                           |                                           |                                                                       | media) compared to controls.                                                                                                                                                                              |                                                                                                                                              |
| <b>Garinis et al. 2020</b><br>"Prospective cohort study of ototoxicity in persons with cystic fibrosis following a single course of intravenous tobramycin." <i>Journal of Cystic Fibrosis</i> | Patients with CF receiving IV antibiotics | Effects of IV-tobramycin on hearing                                   | A single course of IV tobramycin can cause ototoxic hearing loss in some patients with CF.                                                                                                                | Patients with CF need routine ototoxicity monitoring and are suitable for clinical trials of ototherapeutics in single IV-tobramycin course. |
| <b>Garinis et al. 2017</b><br>"The cumulative effects of intravenous antibiotic treatments on hearing in patients with cystic fibrosis." <i>Journal of Cystic Fibrosis</i>                     | Patients with CF receiving IV antibiotics | Effects of amikacin, tobramycin, and vancomycin on hearing thresholds | Patients exposed to two highest dosages of the ototoxic medications were five times more likely to experience permanent hearing loss. Older patients with CF experienced a higher chance of hearing loss. | Patients that are at a higher risk for developing hearing loss should follow an ototoxic monitoring protocol.                                |
| <b>Al-Malky et al. 2015</b><br>"High-frequency audiometry reveals high prevalence of aminoglycoside ototoxicity in children with cystic fibrosis." <i>Journal of Cystic Fibrosis</i>           | Children with CF                          | Efficacy of high-frequency audiometry in ototoxic management          | High frequency testing detected more children with ototoxicity than standard measures. With more courses of IV AG, potential for ototoxicity increases.                                                   | High frequency audiometry should be completed annually in pediatric patients with CF.                                                        |

|                                                                                                                                                            |                                                 |                                                                    |                                                                                                                                                                                        |                                                                                                                                                                               |
|------------------------------------------------------------------------------------------------------------------------------------------------------------|-------------------------------------------------|--------------------------------------------------------------------|----------------------------------------------------------------------------------------------------------------------------------------------------------------------------------------|-------------------------------------------------------------------------------------------------------------------------------------------------------------------------------|
| <b>Handelsman 2018</b><br>"Vestibulotoxicity: strategies for clinical diagnosis and rehabilitation."<br><i>International Journal of Audiology</i>          | Patients with CF receiving IV antibiotics       | Vestibulotoxic medications and their effects                       | Description of common vestibulotoxic medications and their impact on the vestibular system, clinical features of vestibular ototoxicity, and identify assessment tools for monitoring. | Assessment of vestibular function as part of an ototoxic monitoring program is important as cohort data suggests a high prevalence of vestibular involvement.                 |
| <b>Dreisbach et al. 2018</b><br>"High-Frequency Distortion-Product Otoacoustic Emission Repeatability in a Patient Population."<br><i>Ear and Hearing</i>  | Patients with CF NOT receiving IV antibiotics   | Assessing reliability of HF DPOAE as a diagnostic measure          | There was no significant difference in testing ranges throughout four trials for controls.                                                                                             | HF DPOAEs are a repeatable measure in control patients and indicate the test may be sensitive for monitoring purposes.                                                        |
| <b>Rogers C. and Petersen L. 2011</b><br>"Aminoglycoside-induced balance deficits: a review of vestibulotoxicity."<br><i>South African Family Practice</i> | Medical care team members via literature review | Current information about aminoglycoside-induced vestibulotoxicity | Families and patients are not always informed about the potential side effects that accompany ototoxic drugs.                                                                          | Increased education of clinicians is necessary regarding ototoxic drugs and notable side effects. Increased patient education is also needed so they understand side effects. |
